# Supplementary material for: Assessment of native and alkylated polycyclic aromatic hydrocarbons (PAHs) in sediments and mussels (Mytilusspp.) in the southern Baltic Sea
Source: Royal Society of Chemistry journal article supplement (doi:10.1039/c8em00384j), 2019-01-01
Supplement: c8em00384j1.pdf [file c8em00384j1.pdf]

## Supplementary data

**Table S1**

Results for blanks analyzed with every set of 9 samples (ng ml<sup>-1</sup>, mean ± SD).

| Compound | A         | B       |
|----------|-----------|---------|
|          | Sediments | Mussels |
| Naph     | 79±31     | 87±35   |
| Acy      | 2.1±1.0   | 5.4±3.1 |
| Ace      | 2.2±0.8   | 5.1±1.0 |
| Flu      | 8.6±2.0   | 12±5.9  |
| Phe      | 21±9.3    | 91±16   |
| Ant      | 0.4±0.2   | 0.6±0.4 |
| Flt      | 7.6±3.0   | 22±4.3  |
| Pyr      | 11±6.1    | 5.7±1.3 |
| B(a)A    | 1.1±0.6   | 1.1±0.7 |
| Chr      | 1.9±0.9   | 8.6±1.4 |
| B(b)F    | 1.4±0.8   | 5.0±1.6 |
| B(k)F    | 0.6±0.2   | nd      |
| B(a)P    | 0.8±0.3   | nd      |
| I(cd)P   | 0.8±0.3   | 1.2±0.3 |
| DB(ah)A  | 0.4±0.1   | nd      |
| B(ghi)P  | 1.4±0.8   | 1.3±0.6 |

nd - the concentration was below the detection limit.

**Table S2**

Sediment F < 63  $\mu\text{m}$  fractions: OM content and concentrations of native and alkylated PAHs (ng g<sup>-1</sup> dw sediment; mean  $\pm$  SD) in selected locations in the southern Baltic Sea (sample codes reflect the collection sites).

| Site                                     | Gulf of Gdańsk (GoG) |                             |                             | Bornholm Basin (BB)         |                             | Ślupsk Furrow (SF) |               |
|------------------------------------------|----------------------|-----------------------------|-----------------------------|-----------------------------|-----------------------------|--------------------|---------------|
|                                          | Z10                  | P104                        | P110                        | BB25                        | BB45                        | Z7                 | Z8            |
| Sampling year                            | 2013                 | 2014                        | 2014                        | 2014                        | 2014                        | 2013               | 2013          |
| OM (%) <sup>1</sup>                      | 7.7 $\pm$ 0.04       | 8.4 $\pm$ 0.4 <sup>bc</sup> | 13 $\pm$ 0.5 <sup>c</sup>   | 8.9 $\pm$ 0.6 <sup>b</sup>  | 7.5 $\pm$ 0.2 <sup>a</sup>  | 6.7 $\pm$ 0.2      | 5.8 $\pm$ 0.3 |
| <b>Compound</b>                          |                      |                             |                             |                             |                             |                    |               |
| Naph                                     | 9.2                  | 4.8 $\pm$ 0.9 <sup>ab</sup> | 23 $\pm$ 3 <sup>c</sup>     | 3.1 $\pm$ 1.0 <sup>a</sup>  | 7.0 $\pm$ 2.5 <sup>b</sup>  | 2.8                | 0.5           |
| C1-Naph                                  | 19                   | 7.0 $\pm$ 0.9 <sup>a</sup>  | 27 $\pm$ 3 <sup>b</sup>     | 5.0 $\pm$ 2.9 <sup>a</sup>  | 8.7 $\pm$ 3.2 <sup>a</sup>  | 4.2                | 1.1           |
| C2-Naph                                  | 26                   | 12 $\pm$ 0.4 <sup>a</sup>   | 35 $\pm$ 3 <sup>b</sup>     | 11 $\pm$ 3 <sup>a</sup>     | 12 $\pm$ 4 <sup>a</sup>     | 4.5                | 1.9           |
| Acy                                      | 1.6                  | 0.8 $\pm$ 0.1 <sup>a</sup>  | 2.5 $\pm$ 0.3 <sup>c</sup>  | 1.6 $\pm$ 0.1 <sup>b</sup>  | 1.2 $\pm$ 0.4 <sup>ab</sup> | 0.4                | 0.1           |
| Ace                                      | 3.6                  | 3.4 $\pm$ 0.1 <sup>b</sup>  | 11 $\pm$ 1 <sup>c</sup>     | 2.1 $\pm$ 0.1 <sup>a</sup>  | 2.8 $\pm$ 0.7 <sup>ab</sup> | 0.6                | 0.2           |
| C3-Naph                                  | 31                   | 13 $\pm$ 1 <sup>a</sup>     | 36 $\pm$ 3 <sup>b</sup>     | 13 $\pm$ 3 <sup>a</sup>     | 13 $\pm$ 4 <sup>a</sup>     | 6.5                | 4.4           |
| Flu                                      | 7.1                  | 6.3 $\pm$ 0.1 <sup>b</sup>  | 19 $\pm$ 3 <sup>c</sup>     | 4.7 $\pm$ 0.6 <sup>a</sup>  | 4.9 $\pm$ 1.4 <sup>ab</sup> | 1.3                | 0.5           |
| Phe                                      | 38                   | 26 $\pm$ 1 <sup>a</sup>     | 66 $\pm$ 8 <sup>b</sup>     | 31 $\pm$ 3 <sup>a</sup>     | 29 $\pm$ 7 <sup>a</sup>     | 9.1                | 4.0           |
| Ant                                      | 9.1                  | 6.1 $\pm$ 0.2 <sup>b</sup>  | 19 $\pm$ 4 <sup>c</sup>     | 4.9 $\pm$ 0.4 <sup>a</sup>  | 5.1 $\pm$ 1.3 <sup>ab</sup> | 1.4                | 0.6           |
| C1-DBT                                   | 5.5                  | 3.6 $\pm$ 0.2 <sup>a</sup>  | 10 $\pm$ 1 <sup>c</sup>     | 4.8 $\pm$ 0.2 <sup>b</sup>  | 3.5 $\pm$ 0.9 <sup>a</sup>  | 2.0                | 1.2           |
| C1-Phe/Ant                               | 63                   | 42 $\pm$ 2 <sup>a</sup>     | 100 $\pm$ 10 <sup>b</sup>   | 45 $\pm$ 2 <sup>a</sup>     | 41 $\pm$ 10 <sup>a</sup>    | 13                 | 8.8           |
| C2-DBT                                   | 8.4                  | 5.4 $\pm$ 0.3 <sup>a</sup>  | 18 $\pm$ 2 <sup>c</sup>     | 7.0 $\pm$ 0.2 <sup>b</sup>  | 4.7 $\pm$ 1.4 <sup>a</sup>  | 2.8                | 2.3           |
| Flt                                      | 114                  | 85 $\pm$ 4 <sup>a</sup>     | 216 $\pm$ 25 <sup>c</sup>   | 92 $\pm$ 4 <sup>b</sup>     | 97 $\pm$ 13 <sup>b</sup>    | 31                 | 11            |
| Pyr                                      | 91                   | 62 $\pm$ 3 <sup>a</sup>     | 159 $\pm$ 18 <sup>c</sup>   | 84 $\pm$ 6 <sup>b</sup>     | 78 $\pm$ 19 <sup>ab</sup>   | 23                 | 9.1           |
| C2-Phe/Ant                               | 78                   | 51 $\pm$ 2 <sup>a</sup>     | 131 $\pm$ 15 <sup>c</sup>   | 55 $\pm$ 2 <sup>b</sup>     | 47 $\pm$ 11 <sup>ab</sup>   | 22                 | 17            |
| B(a)A                                    | 50                   | 33 $\pm$ 2 <sup>a</sup>     | 85 $\pm$ 11 <sup>c</sup>    | 44 $\pm$ 3 <sup>b</sup>     | 40 $\pm$ 10 <sup>b</sup>    | 12                 | 4.3           |
| Chr                                      | 43                   | 29 $\pm$ 2 <sup>a</sup>     | 71 $\pm$ 10 <sup>c</sup>    | 40 $\pm$ 3 <sup>b</sup>     | 36 $\pm$ 8 <sup>ab</sup>    | 14                 | 5.6           |
| B(b)F                                    | 80                   | 53 $\pm$ 3 <sup>a</sup>     | 170 $\pm$ 28 <sup>c</sup>   | 153 $\pm$ 18 <sup>bc</sup>  | 121 $\pm$ 34 <sup>b</sup>   | 55                 | 19            |
| B(k)F                                    | 59                   | 39 $\pm$ 3 <sup>a</sup>     | 121 $\pm$ 18 <sup>c</sup>   | 94 $\pm$ 9 <sup>b</sup>     | 76 $\pm$ 20 <sup>b</sup>    | 36                 | 12            |
| B(a)P                                    | 88                   | 56 $\pm$ 3 <sup>a</sup>     | 146 $\pm$ 21 <sup>c</sup>   | 89 $\pm$ 6 <sup>b</sup>     | 79 $\pm$ 20 <sup>b</sup>    | 22                 | 8.1           |
| I(cd)P                                   | 99                   | 64 $\pm$ 3 <sup>a</sup>     | 221 $\pm$ 37 <sup>b</sup>   | 281 $\pm$ 32 <sup>c</sup>   | 205 $\pm$ 60 <sup>b</sup>   | 96                 | 31            |
| DB(ah)A                                  | 16                   | 9 $\pm$ 0.3 <sup>a</sup>    | 32 $\pm$ 6 <sup>b</sup>     | 35 $\pm$ 4 <sup>b</sup>     | 27 $\pm$ 9 <sup>b</sup>     | 10                 | 3.3           |
| B(ghi)P                                  | 63                   | 39 $\pm$ 2 <sup>a</sup>     | 129 $\pm$ 19 <sup>b</sup>   | 145 $\pm$ 17 <sup>b</sup>   | 111 $\pm$ 31 <sup>b</sup>   | 55                 | 18            |
| $\Sigma$ 3-ring PAHs                     | 59                   | 43 $\pm$ 2 <sup>a</sup>     | 118 $\pm$ 16 <sup>b</sup>   | 45 $\pm$ 3 <sup>a</sup>     | 43 $\pm$ 11 <sup>a</sup>    | 13                 | 5.4           |
| $\Sigma$ 4-ring PAHs                     | 300                  | 208 $\pm$ 10 <sup>a</sup>   | 531 $\pm$ 64 <sup>c</sup>   | 260 $\pm$ 14 <sup>b</sup>   | 251 $\pm$ 60 <sup>ab</sup>  | 79                 | 30            |
| $\Sigma$ 5-ring PAHs                     | 242                  | 158 $\pm$ 9 <sup>a</sup>    | 469 $\pm$ 72 <sup>c</sup>   | 371 $\pm$ 35 <sup>bc</sup>  | 302 $\pm$ 82 <sup>b</sup>   | 123                | 42            |
| $\Sigma$ 6-ring PAHs                     | 162                  | 103 $\pm$ 5 <sup>a</sup>    | 350 $\pm$ 56 <sup>b</sup>   | 426 $\pm$ 49 <sup>c</sup>   | 316 $\pm$ 91 <sup>b</sup>   | 151                | 48            |
| $\Sigma$ <sub>16</sub> PAHs <sup>2</sup> | 772                  | 517 $\pm$ 25 <sup>a</sup>   | 1490 $\pm$ 205 <sup>c</sup> | 1104 $\pm$ 99 <sup>b</sup>  | 919 $\pm$ 246 <sup>b</sup>  | 369                | 126           |
| $\Sigma$ aPAHs <sup>3</sup>              | 231                  | 134 $\pm$ 6 <sup>a</sup>    | 358 $\pm$ 35 <sup>b</sup>   | 140 $\pm$ 11 <sup>a</sup>   | 130 $\pm$ 35 <sup>a</sup>   | 55                 | 36            |
| $\Sigma$ PAHs <sup>4</sup>               | 1002                 | 650 $\pm$ 31 <sup>a</sup>   | 1847 $\pm$ 239 <sup>c</sup> | 1244 $\pm$ 108 <sup>b</sup> | 1049 $\pm$ 281 <sup>b</sup> | 424                | 162           |
| $\Sigma$ aPAHs (%) <sup>5</sup>          | 23                   | 21 $\pm$ 0.2 <sup>b</sup>   | 19 $\pm$ 1 <sup>b</sup>     | 11 $\pm$ 1 <sup>a</sup>     | 12 $\pm$ 0.4 <sup>a</sup>   | 13                 | 21            |
| Ant/(Phe+Ant)                            | 0.20                 | 0.19                        | 0.22                        | 0.14                        | 0.15                        | 0.13               | 0.12          |
| Flt/(Flt+Pyr)                            | 0.56                 | 0.58                        | 0.58                        | 0.52                        | 0.56                        | 0.58               | 0.54          |
| (C1-Phe/Ant)/Phe                         | 1.67                 | 1.59                        | 1.52                        | 1.45                        | 1.39                        | 1.41               | 2.22          |

<sup>1</sup>Organic matter content; <sup>2</sup>The sum of 16 native PAHs; <sup>3</sup>The sum of alkylated PAH derivatives; <sup>4</sup>The sum of the native and alkylated PAHs; <sup>5</sup> $\Sigma$ aPAH expressed as the percentage (%) of  $\Sigma$ PAHs; <sup>a,b,c</sup> ANOVA statistics (and Tukey test) or Kruskal-Wallis test.

**Table S3**

Correlations between the concentrations of PAHs and the content of fines ( $F < 63 \mu\text{m}$ ) and organic matter (OM) in whole sediments (A and B, respectively), and between PAH concentrations and LOI in the sediment fraction  $< 63 \mu\text{m}$  (C).

| Compound             | A                                      |      | B                             |             | C                                 |               |
|----------------------|----------------------------------------|------|-------------------------------|-------------|-----------------------------------|---------------|
|                      | Whole sediment<br>$F < 63 \mu\text{m}$ |      | Whole sediment<br>OM          |             | Fraction $< 63 \mu\text{m}$<br>OM |               |
|                      | $R^{2a}$ or $R_s^b$                    | $p$  | $R^2$ or $R_s$                | $p$         | $R^2$ or $R_s$                    | $p$           |
| Naph                 | $R_s$ , 0.25                           | 0.59 | $R_s$ , 0.46                  | 0.29        | $R_s$ , 0.68                      | 0.09          |
| C1-Naph              | $R_s$ , 0.19                           | 0.70 | $R_s$ , 0.14                  | 0.76        | <b><math>R^2</math>, 0.64</b>     | <b>0.03</b>   |
| C2-Naph              | $R_s$ , 0.50                           | 0.25 | $R_s$ , 0.75                  | 0.05        | <b><math>R^2</math>, 0.69</b>     | <b>0.02</b>   |
| Acy                  | $R^2$ , 0.001                          | 0.94 | <b><math>R^2</math>, 0.68</b> | <b>0.02</b> | <b><math>R^2</math>, 0.76</b>     | <b>0.01</b>   |
| Ace                  | $R^2$ , 0.02                           | 0.78 | $R^2$ , 0.54                  | 0.06        | $R_s$ , <b>0.75</b>               | <b>0.05</b>   |
| C3-Naph              | $R_s$ , 0.61                           | 0.15 | $R_s$ , 0.50                  | 0.25        | <b><math>R^2</math>, 0.61</b>     | <b>0.04</b>   |
| Flu                  | $R^2$ , 0.01                           | 0.80 | <b><math>R^2</math>, 0.57</b> | <b>0.05</b> | $R_s$ , <b>0.75</b>               | <b>0.05</b>   |
| Phe                  | $R^2$ , 0.05                           | 0.63 | $R^2$ , 0.44                  | 0.10        | <b><math>R^2</math>, 0.87</b>     | <b>0.002</b>  |
| Ant                  | $R^2$ , 0.02                           | 0.78 | $R^2$ , 0.52                  | 0.07        | <b><math>R^2</math>, 0.88</b>     | <b>0.002</b>  |
| C1-DBT               | $R_s$ , 0.50                           | 0.25 | <b><math>R_s</math>, 0.75</b> | <b>0.05</b> | <b><math>R^2</math>, 0.91</b>     | <b>0.0008</b> |
| C1-Phe/Ant           | $R^2$ , 0.0007                         | 0.86 | <b><math>R^2</math>, 0.58</b> | <b>0.04</b> | <b><math>R^2</math>, 0.83</b>     | <b>0.0004</b> |
| C2-DBT               | $R_s$ , 0.46                           | 0.29 | $R_s$ , 0.68                  | 0.09        | <b><math>R^2</math>, 0.92</b>     | <b>0.0007</b> |
| Flt                  | $R^2$ , 0.006                          | 0.87 | <b><math>R^2</math>, 0.58</b> | <b>0.04</b> | <b><math>R^2</math>, 0.88</b>     | <b>0.002</b>  |
| Pyr                  | $R^2$ , 0.01                           | 0.83 | <b><math>R^2</math>, 0.57</b> | <b>0.04</b> | <b><math>R^2</math>, 0.85</b>     | <b>0.003</b>  |
| C2-Phe/Ant           | $R_s$ , 0.64                           | 0.12 | $R_s$ , 0.71                  | 0.07        | <b><math>R^2</math>, 0.86</b>     | <b>0.003</b>  |
| B(a)A                | $R^2$ , 0.003                          | 0.91 | <b><math>R^2</math>, 0.63</b> | <b>0.03</b> | <b><math>R^2</math>, 0.84</b>     | <b>0.004</b>  |
| Chr                  | $R^2$ , 0.0006                         | 0.96 | <b><math>R^2</math>, 0.65</b> | <b>0.03</b> | <b><math>R^2</math>, 0.84</b>     | <b>0.004</b>  |
| B(b)F                | $R^2$ , 0.04                           | 0.65 | <b><math>R^2</math>, 0.70</b> | <b>0.02</b> | <b><math>R^2</math>, 0.61</b>     | <b>0.04</b>   |
| B(k)F                | $R^2$ , 0.03                           | 0.72 | <b><math>R^2</math>, 0.70</b> | <b>0.02</b> | <b><math>R^2</math>, 0.73</b>     | <b>0.02</b>   |
| B(a)P                | $R^2$ , 0.001                          | 0.96 | <b><math>R^2</math>, 0.67</b> | <b>0.03</b> | <b><math>R^2</math>, 0.80</b>     | <b>0.007</b>  |
| I(cd)P               | $R^2$ , 0.1                            | 0.47 | <b><math>R^2</math>, 0.63</b> | <b>0.03</b> | $R^2$ , 0.33                      | 0.18          |
| DB(ah)A              | $R^2$ , 0.07                           | 0.56 | <b><math>R^2</math>, 0.68</b> | <b>0.02</b> | $R^2$ , 0.44                      | 0.11          |
| B(ghi)P              | $R^2$ , 0.08                           | 0.54 | <b><math>R^2</math>, 0.65</b> | <b>0.03</b> | $R^2$ , 0.41                      | 0.12          |
| $\Sigma_{16}$ PAHs   | $R^2$ , 0.008                          | 0.85 | <b><math>R^2</math>, 0.68</b> | <b>0.02</b> | <b><math>R^2</math>, 0.75</b>     | <b>0.01</b>   |
| $\Sigma_a$ PAHs      | $R_s$ , 0.50                           | 0.25 | <b><math>R_s</math>, 0.75</b> | <b>0.05</b> | <b><math>R^2</math>, 0.81</b>     | <b>0.006</b>  |
| $\Sigma$ PAHs        | $R^2$ , 0.005                          | 0.88 | <b><math>R^2</math>, 0.68</b> | <b>0.02</b> | <b><math>R^2</math>, 0.80</b>     | <b>0.006</b>  |
| $\Sigma$ 3-ring PAHs | $R^2$ , 0.03                           | 0.71 | $R^2$ , 0.50                  | 0.08        | <b><math>R^2</math>, 0.90</b>     | <b>0.001</b>  |
| $\Sigma$ 4-ring PAHs | $R^2$ , 0.005                          | 0.88 | <b><math>R^2</math>, 0.60</b> | <b>0.04</b> | <b><math>R^2</math>, 0.86</b>     | <b>0.003</b>  |
| $\Sigma$ 5-ring PAHs | $R^2$ , 0.02                           | 0.75 | <b><math>R^2</math>, 0.70</b> | <b>0.02</b> | <b><math>R^2</math>, 0.71</b>     | <b>0.02</b>   |
| $\Sigma$ 6-ring PAHs | $R^2$ , 0.10                           | 0.50 | <b><math>R^2</math>, 0.64</b> | <b>0.03</b> | $R^2$ , 0.36                      | 0.16          |

<sup>a</sup> $R^2$  – Pearson correlation; <sup>b</sup> $R_s$  – Spearman correlation. Statistically significant correlations ( $p \leq 0.05$ ) are bold.

**Table S4**

PCA results. A – whole sediment samples, B – sediment F &lt; 63 µm fractions, C – mussels.

|                      | A              |              |             | B                         |             |             | C            |              |              |
|----------------------|----------------|--------------|-------------|---------------------------|-------------|-------------|--------------|--------------|--------------|
|                      | Whole sediment |              |             | Sediment fraction < 63 µm |             |             | Mussels      |              |              |
|                      | PC1            | PC2          | PC3         | PC1                       | PC2         | PC3         | PC1          | PC2          | PC3          |
| <b>% of variance</b> | 51             | 34           | 8.8         | 69                        | 19          | 5.5         | 50           | 25           | 11           |
| <b>Eigenvalues</b>   | 13             | 8.5          | 2.2         | 16.45                     | 4.60        | 1.32        | 11.61        | 5.69         | 2.50         |
| F<63µm               | <b>-0.66</b>   | -0.22        | 0.17        | -                         | -           | -           | -            | -            | -            |
| OM (%)               | -0.11          | -0.28        | <b>0.94</b> | <b>0.52</b>               | -0.45       | <b>0.65</b> | -            | -            | -            |
| Naph                 | 0.29           | <b>0.80</b>  | 0.44        | <b>0.73</b>               | -0.24       | 0.43        | 0.34         | 0.08         | <b>-0.88</b> |
| C1-Naph              | 0.13           | <b>0.97</b>  | -0.01       | <b>0.78</b>               | 0.03        | -0.01       | <b>0.69</b>  | -0.28        | <b>-0.59</b> |
| C2-Naph              | 0.14           | <b>0.98</b>  | 0.08        | <b>0.92</b>               | 0.12        | -0.13       | <b>0.92</b>  | -0.33        | -0.16        |
| Acy                  | 0.31           | -0.28        | <b>0.86</b> | <b>0.69</b>               | -0.47       | -0.25       | -0.01        | <b>0.64</b>  | <b>-0.67</b> |
| Ace                  | <b>0.94</b>    | -0.17        | 0.18        | <b>0.90</b>               | -0.22       | 0.33        | 0.36         | 0.30         | <b>0.65</b>  |
| C3-Naph              | 0.02           | <b>0.99</b>  | -0.06       | <b>0.54</b>               | <b>0.76</b> | -0.19       | <b>0.87</b>  | -0.41        | 0.23         |
| Flu                  | <b>0.97</b>    | -0.08        | 0.22        | <b>0.92</b>               | -0.15       | 0.33        | <b>0.55</b>  | 0.24         | 0.30         |
| Phe                  | <b>0.90</b>    | -0.12        | -0.31       | <b>0.98</b>               | -0.07       | -0.07       | -0.15        | <b>0.97</b>  | 0.003        |
| Ant                  | <b>0.95</b>    | -0.27        | 0.05        | <b>0.97</b>               | -0.13       | 0.18        | <b>-0.50</b> | <b>0.79</b>  | 0.07         |
| C1-DBT               | 0.13           | <b>0.96</b>  | 0.13        | 0.26                      | <b>0.94</b> | 0.18        | <b>0.73</b>  | <b>-0.51</b> | 0.38         |
| C1-Phe/Ant           | <b>0.91</b>    | 0.39         | -0.08       | <b>0.86</b>               | 0.45        | -0.13       | -0.16        | <b>0.95</b>  | 0.12         |
| C2- DBT              | 0.05           | <b>0.94</b>  | 0.25        | 0.18                      | <b>0.92</b> | 0.28        | -0.10        | <b>0.75</b>  | 0.36         |
| Flt                  | <b>0.92</b>    | -0.37        | -0.07       | <b>0.95</b>               | -0.23       | 0.03        | <b>-0.72</b> | <b>-0.61</b> | 0.07         |
| Pyr                  | <b>0.92</b>    | -0.31        | -0.19       | <b>0.94</b>               | -0.27       | -0.13       | <b>-0.87</b> | -0.46        | 0.12         |
| C2-Phe/Ant           | 0.32           | <b>0.90</b>  | 0.07        | 0.41                      | <b>0.90</b> | 0.04        | <b>-0.68</b> | -0.22        | 0.03         |
| B(a)A                | <b>0.83</b>    | <b>-0.53</b> | 0.06        | <b>0.93</b>               | -0.33       | -0.15       | <b>-0.90</b> | -0.41        | -0.06        |
| Chr                  | <b>0.81</b>    | -0.47        | 0.04        | <b>0.94</b>               | 0.11        | -0.21       | <b>-0.92</b> | -0.26        | -0.07        |
| B(b)F                | <b>-0.93</b>   | -0.35        | 0.13        | <b>-0.99</b>              | -0.07       | 0.12        | <b>-0.94</b> | -0.02        | -0.06        |
| B(k)F                | <b>-0.74</b>   | <b>-0.63</b> | 0.10        | <b>-0.95</b>              | -0.04       | 0.21        | <b>-0.95</b> | -0.05        | -0.03        |
| B(a)P                | <b>0.56</b>    | <b>-0.79</b> | 0.13        | <b>0.83</b>               | -0.48       | -0.25       | <b>-0.88</b> | -0.36        | -0.05        |
| I(cd)P               | <b>-0.99</b>   | -0.11        | -0.01       | <b>-0.99</b>              | -0.12       | 0.03        | <b>-0.94</b> | -0.01        | 0.01         |
| DB(ah)A              | <b>-0.97</b>   | 0.01         | 0.02        | <b>-0.88</b>              | -0.43       | -0.05       | <b>-0.67</b> | <b>0.66</b>  | -0.10        |
| B(ghi)P              | <b>-0.98</b>   | -0.17        | 0.02        | <b>-0.99</b>              | -0.02       | 0.03        | <b>-0.92</b> | -0.20        | 0.08         |
